# Supplementary material for: Differential miRNA expression profiles in proliferating or differentiated keratinocytes in response to gamma irradiation
Source: PubMed Central journal article supplement (PMC3610249; doi:10.1186/1471-2164-14-184), 2013-03-16

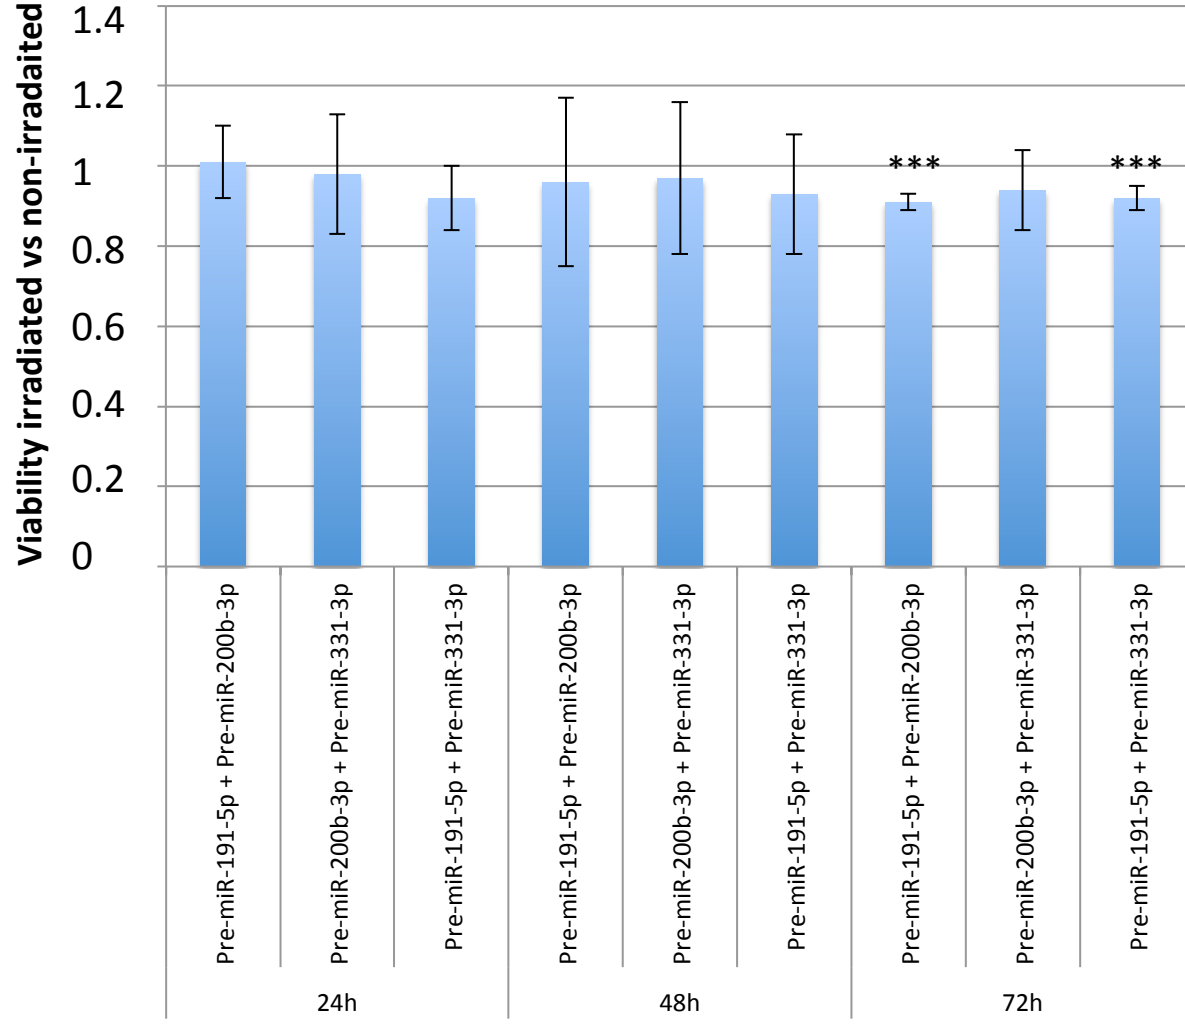

Supplement: 1471-2164-14-184-S2.pdf [file 1471-2164-14-184-S2.pdf]
