# Supplementary material for: Differential miRNA expression profiles in proliferating or differentiated keratinocytes in response to gamma irradiation
Source: PubMed Central journal article supplement (PMC3610249; doi:10.1186/1471-2164-14-184), 2013-03-16

miR-200b-3p

miR-331-3p

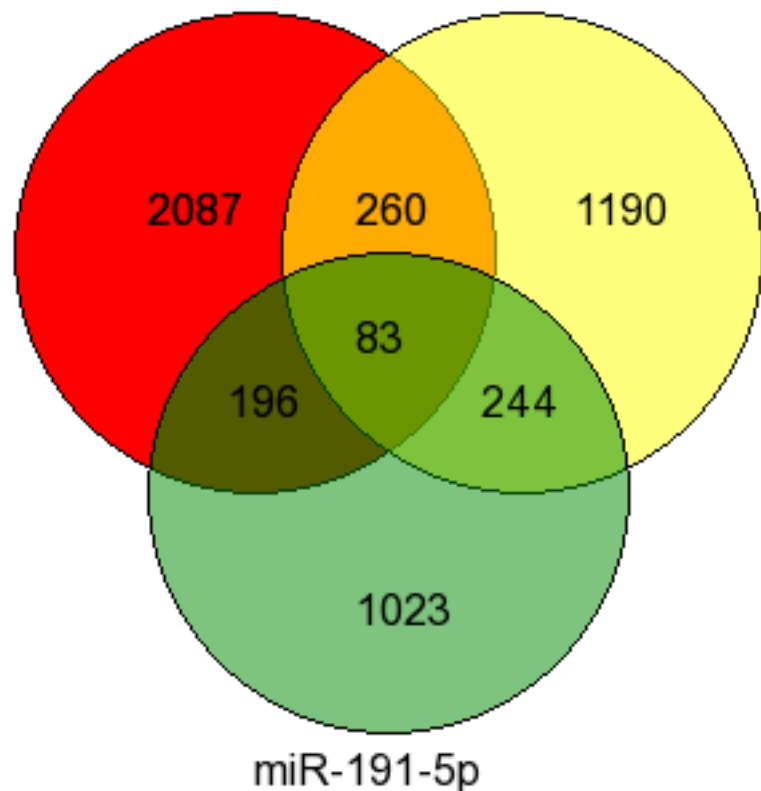

Supplement: 1471-2164-14-184-S3.pdf [file 1471-2164-14-184-S3.pdf]
